# Supplementary material for: Cooperative effect of “flexible” interaction and “flexible” framework in reversible intake and removal of aromatic guest molecules
Source: Royal Society of Chemistry journal article supplement (doi:10.1039/c3dt50772f), 2013-01-01
Supplement: c3dt50772f.pdf [file c3dt50772f.pdf]

## **Cooperative Effect of "Flexible" Interaction and "Flexible" Framework in Reversible Intake and Removal of Aromatic Guest Molecules**

Kumari Suman,<sup>a</sup> Rajnikant,<sup>b</sup> Vivek K. Gupta<sup>b</sup> and Madhushree Sarkar\*<sup>a</sup>

<sup>a</sup> Department of Chemistry, Birla Institute of Technology and Science , Pilani, Pilani Campus, Rajasthan, India. Fax: +91-1596-244183; Tel: +91-1596-245073; E-mail: msarkar@pilani.bits-pilani.ac.in

<sup>b</sup> Post Graduate Department of Physics, University of Jammu, Jammu Tawi, India. Fax/Tel:+91-191-2432051 E-mail: rkvk.paper11@gmail.com

Supporting Information

(Synthesis details, ORTEP, IR Spectra, Powder XRD, Solid State UV-Vis)

**General:** Infra-red spectrum was recorded in FTIR ABB Bomen MB-3000. UV-Vis absorption spectra were recorded in Shimadzu Spectrophotometer with model UV-2450. Elemental analyses were obtained with a Thermo finnigan, Italy, Model FLASH EA 1112 series. Thermogravimetric analysis (TGA) data were recorded under a N<sub>2</sub> atmosphere at a heating rate of 2°Cmin<sup>-1</sup> with a Perkin-Elmer instrument. Powder X-ray diffraction (XRD) data were recorded with a Rigaku miniflex II,  $\lambda = 1.54$ , Cu K $\alpha$ . DSC was performed by DSC-60 Shimadzu, Pan-Copper, N<sub>2</sub> atmosphere, Heating rate: 10°C/minute. The single crystal data was collected on a Xcalibur, Sapphire3 X-ray diffractometer that uses graphite monochromated Mo K $\alpha$  radiation ( $\lambda = 0.71073$  Å) by the  $\omega$ -scan method.<sup>1</sup> The structures were solved by direct methods and refined by least square methods on F<sup>2</sup> using SHELX-97.<sup>2</sup> Non-hydrogen atoms were refined anisotropically and hydrogen atoms were fixed at calculated positions and refined using a riding model.

**Synthesis of Ligand:** The ligand was synthesized according to a literature procedure<sup>2</sup>. 3-Amino pyridine (2 mmol) was added to 40 mL of a pyridine solution of succinic acid (1 mmol), and the solution was stirred for 15 min. To this solution was added triphenyl phosphite (2 mmol), and the mixture was refluxed for 5 h. The volume of the solution was reduced to 5 mL by distilling out the pyridine, and a white precipitate was obtained. The solid was filtered, washed with water, and dried under vacuum. Yield: 70 %. Mp: 195–198°C; IR (cm<sup>-1</sup>): 3301(w), 3232(m), 3178(m), 3116(m), 3039(s), 2954(vs), 2908(vs), 1689(vs), 1612 (s), 1589(vs), 1550(vs), 1473(s), 1419(vs), 1326(vs), 1272(s), 1157(vs), 1126(m), 1033(m), 948 (w), 856 (s), 802(s), 694(s), 617 (m).

**Synthesis of crystals of 3:** A solution of NH<sub>4</sub>PF<sub>6</sub> (65.2 mg, 0.4 mmol) in 2mL water was added to a stirred solution of the ligand (54 mg, 0.2 mmol) in 5 mL of (1:1) water-ethanol solution. An ethanolic solution (2 mL) of Cu(NO<sub>3</sub>)<sub>2</sub> (25 mg, 0.1 mmol) was layered over the ligand solution. This resulted in the formation of a blue precipitate. Blue colored crystals were formed after 1 week in 70 % yield. Elemental Analysis: C<sub>28</sub>H<sub>32</sub>CuF<sub>12</sub>N<sub>8</sub>O<sub>6</sub>P<sub>2</sub> (930.08) Calculated: C 36.16 % , H 3.47 % ; Found: C 35.3854 % , H 3.4610 % ; IR (cm<sup>-1</sup>): 3386(s), 3280(m), 3185(w), 3109(w), 3073(w), 3054(w), 1688(vs), 1612(m), 1535(vs), 1488(s), 1419(m), 1334(m), 1288(m), 1195(m), 1149(w), 1110(w), 1064(w), 972(w), 826(vs), 702(m), 617(m), 547(s)

The above reaction was also performed by taking aromatic solvents. A solution of NH<sub>4</sub>PF<sub>6</sub> (65.2 mg, 0.4 mmol) in 2mL water was added to a stirred solution of the ligand (54 mg, 0.2 mmol) in 5 mL of (1:1) water-ethanol solution. To this solution, 5mL of

nitrobenzene/benzonitrile/toluene/xylenes were added and the solution was stirred for 30 min. An ethanolic solution (2 mL) of  $\text{Cu}(\text{NO}_3)_2$  (25 mg, 0.1 mmol) was layered over the ligand solution. Blue colored crystals were formed after 10 days.

**Synthesis of Complex 4a-c by anion exchange reaction:** The anion exchange reactions were performed by immersing the crystals of complex **3** (0.05 mmol) in ethanol solution (5mL) of  $\text{NaClO}_4$  (0.2mmol). To this, 5mL of nitrobenzene/benzonitrile/*p*-xylenes was added. After three days, the crystals were characterized by IR and powder XRD.

**IR ( $\text{cm}^{-1}$ ) 4a:** 3325(s), 3101(w), 3070(w), 1681(s), 1612(m), 1527(vs), 1488(s), 1411(m), 1334(vs), 1288(m), 1195(w), 1065(s), 972(w), 810(w), 702(w), 617(s), 555(m)

**4b:** 3409(w), 3325(m), 3070 (m), 2229 (s), 1689 (s), 1604(w), 1542(s), 1488(s), 1450(m), 1411(w), 1334(w), 1288(m), 1249(w), 1064(s), 756(vs), 686(vs)

**4c:** 3325(s), 3101 (w), 1689 (s), 1612(w), 1544(vs), 1488(s), 1411(m), 1334(m), 1288(m), 1248(w), 1195(w), 1064(vs), 972(w), 925(w), 810(m), 702(s), 617(s)

**Preparation of Apohost 4:** 4a/4b/4c/4d was washed thoroughly with  $\text{CHCl}_3$  and then keeping under vacuum for 4-5h.

**IR ( $\text{cm}^{-1}$ ):** 3325(m), 3101 (w), 3070(w), 1681 (vs), 1612(m), 1542(vs), 1488(s), 1411(m), 1334(m), 1288(m), 1195(m), 1064(vs), 972(w), 925(w), 810(m), 702(s), 617(s)

**Anion exchange reaction of 4a-c with  $\text{NH}_4\text{PF}_6$ :** The anion exchange reactions were performed by immersing the crystals of complex **4a/b/c** (0.05 mmol) in ethanol solution (5mL) of  $\text{NH}_4\text{PF}_6$  (0.2mmol). To this, 5mL of nitrobenzene/benzonitrile/*p*-xylene was added. After three days, the crystals were characterized by IR and powder XRD.

**Figure S1: IR spectra of Ligand 1a:**

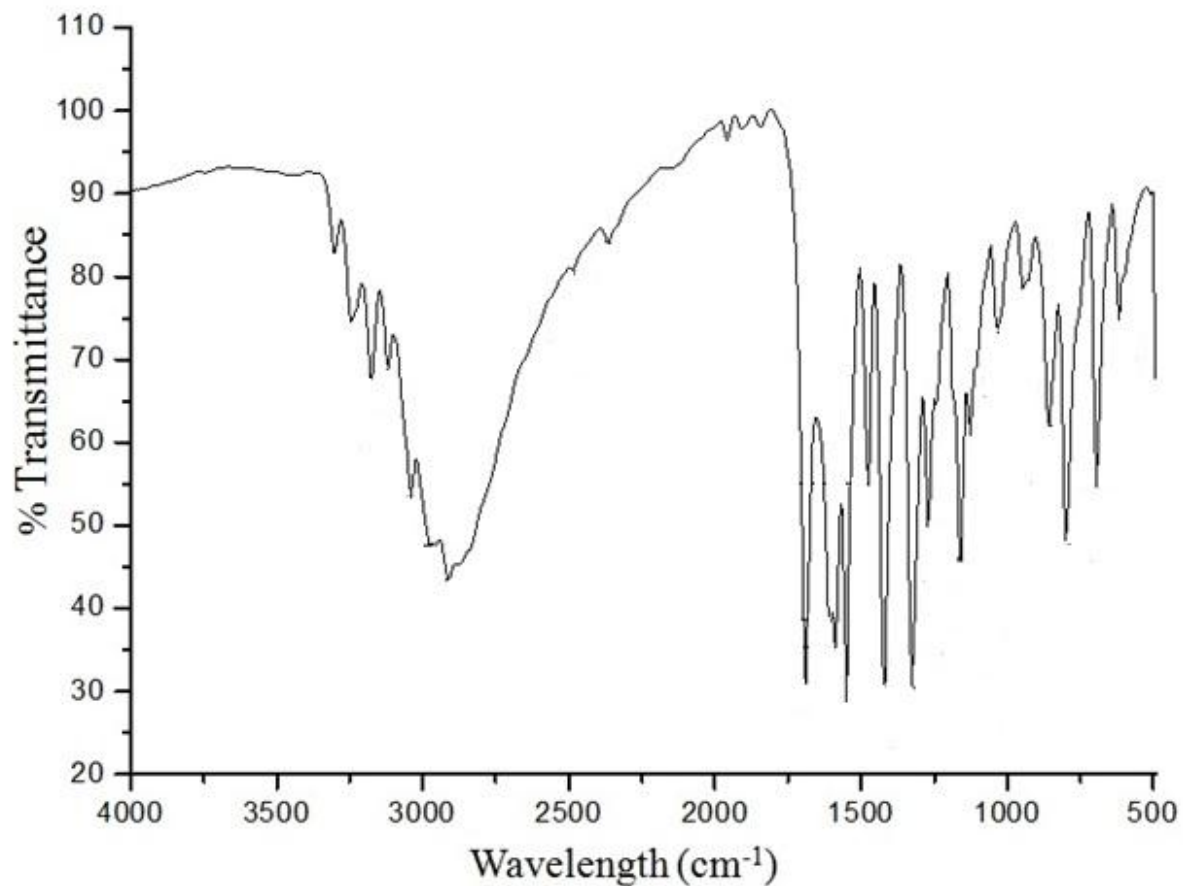

**IR (cm<sup>-1</sup>):** 3301(w), 3232(m), 3178(m), 3116(m), 3039(s), 2954(vs), 2908(vs), 1689(vs), 1612 (s), 1589(vs), 1550(vs), 1473(s), 1419(vs), 1326(vs), 1272(s), 1157(vs), 1126(m), 1033(m), 948 (w), 856 (s), 802(s), 694(s), 617 (m)

**Figure S 2: IR spectra of complex 3:**

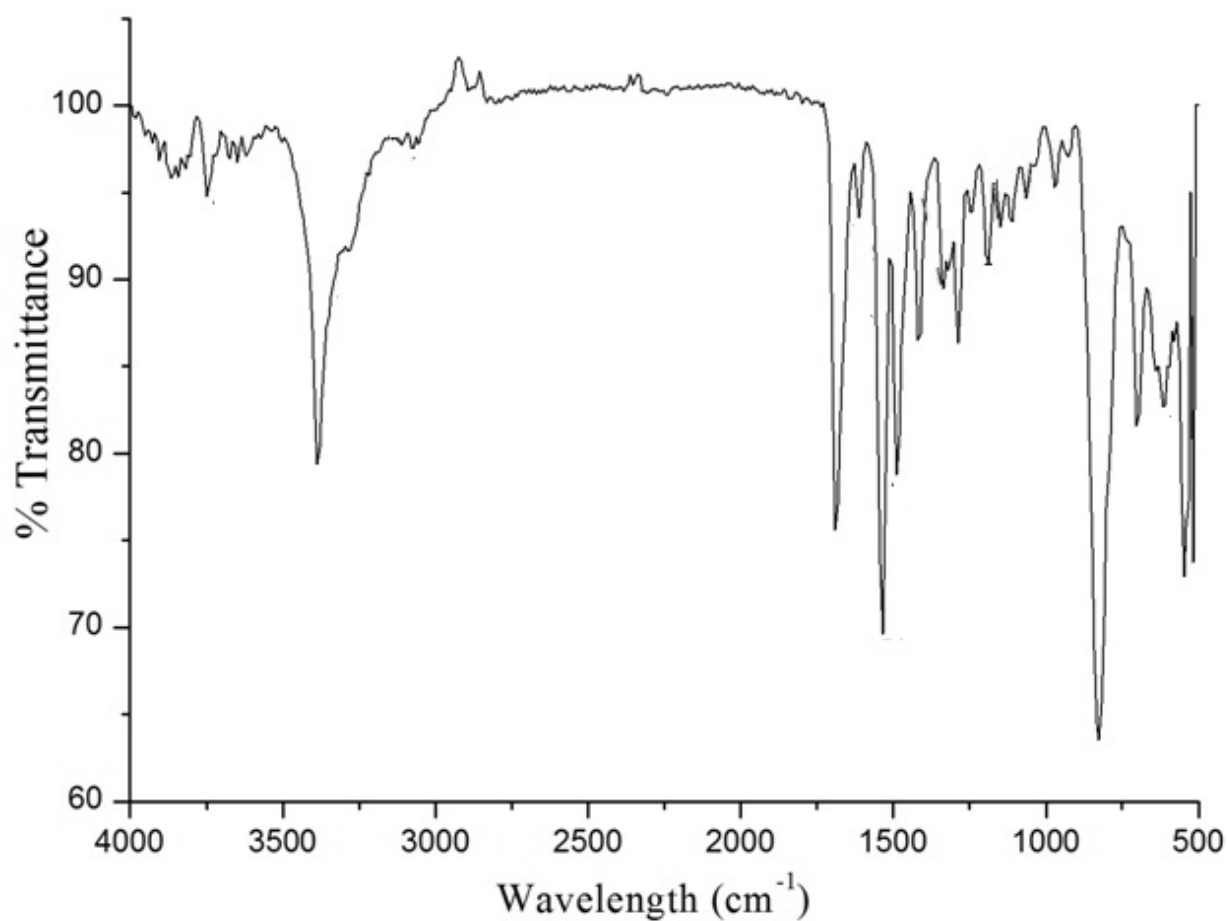

**IR (cm<sup>-1</sup>):** 3386(s), 3280(m), 3185(w), 3109(w), 3073(w), 3054(w), 1688(vs), 1612(m), 1535(vs), 1488(s), 1419(m), 1334(m), 1288(m), 1195(m), 1149(w), 1110(w), 1064(w), 972(w), 826(vs), 702(m), 617(m), 547(s)

**Figure S 3. IR spectra of complex 4a:**

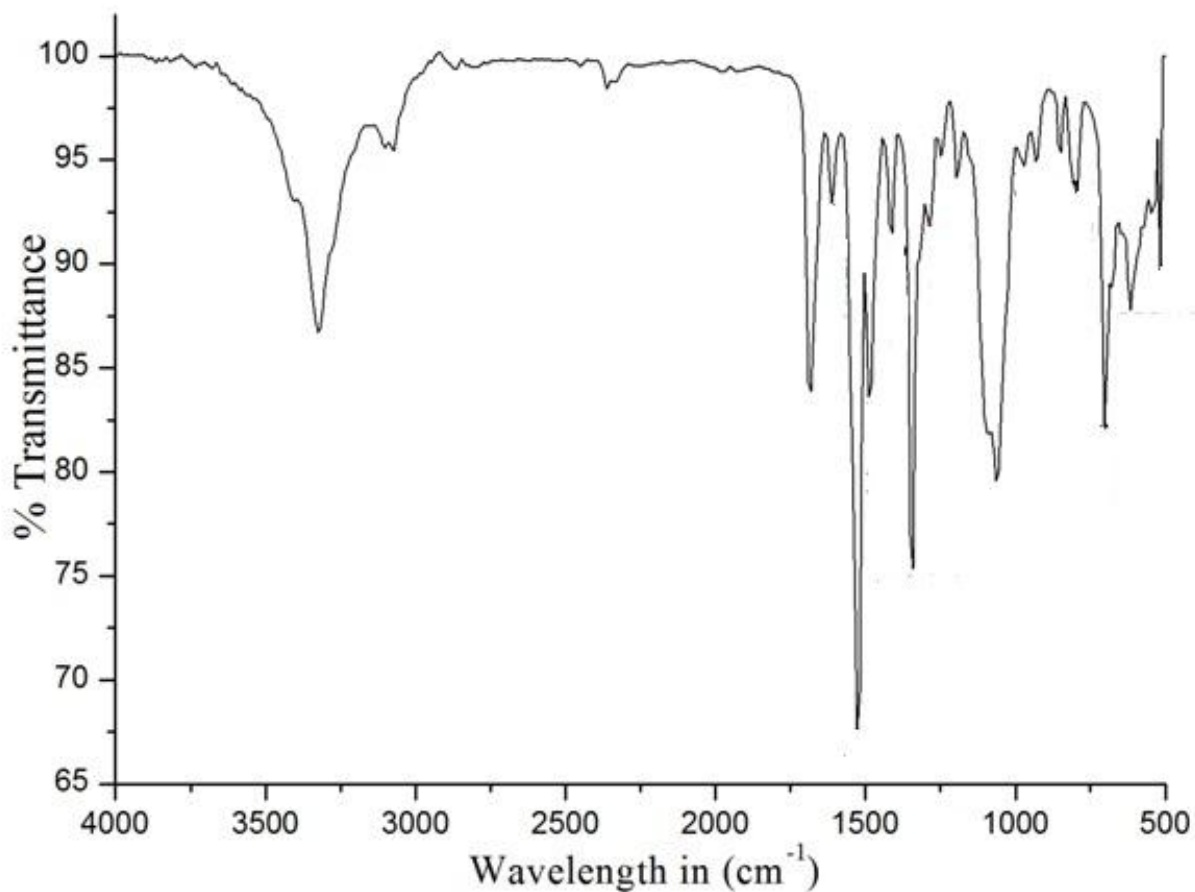

**IR (cm<sup>-1</sup>):** 3325(s), 3101(w), 3070(w), 1681(s), 1612(m), 1527(vs), 1488(s), 1411(m), 1334(vs), 1288(m), 1195(w), 1065(s), 972(w), 810(w), 702(w), 617(s), 555(m)

**Figure S 4. IR spectra of complex 4b:**

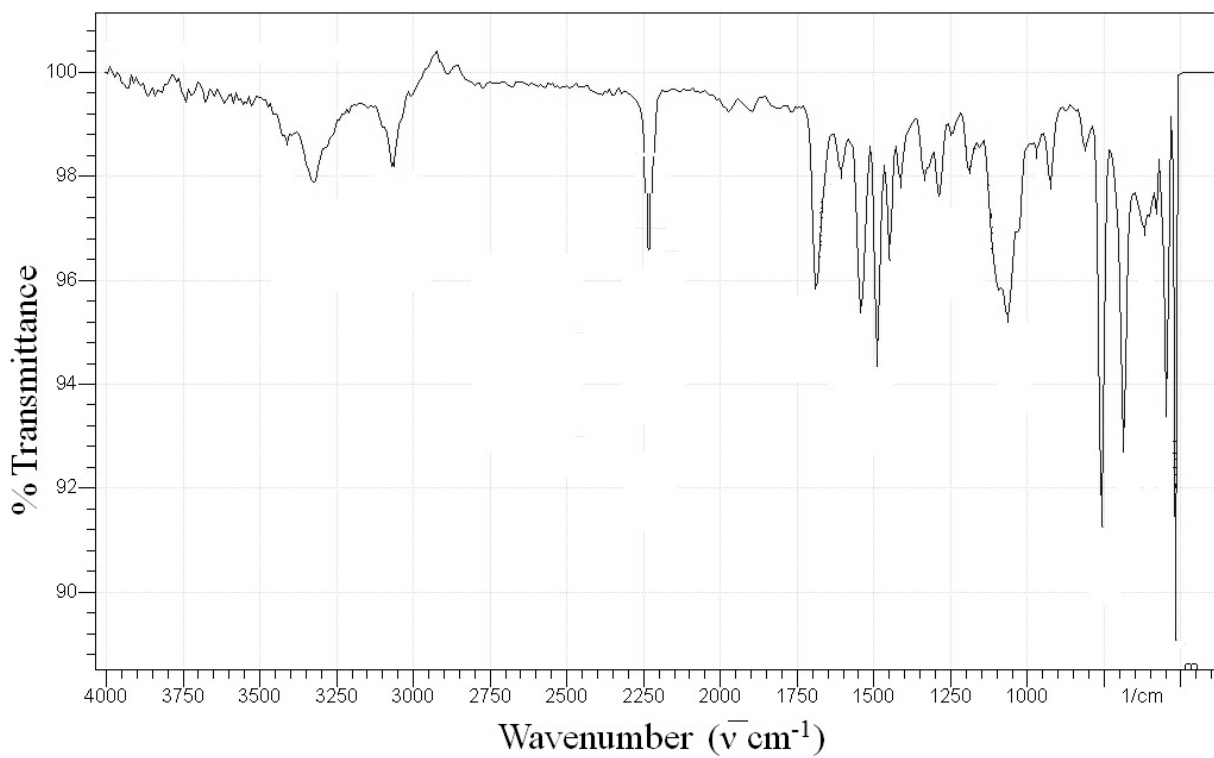

**IR ( $\text{cm}^{-1}$ ):** 3409(w), 3325(m), 3070 (m), 2229 (s), 1689 (s), 1604(w), 1542(s), 1488(s), 1450(m), 1411(w), 1334(w), 1288(m), 1249(w), 1064(s), 756(vs), 686(vs)

**Figure S 5. IR spectra of complex 4c:**

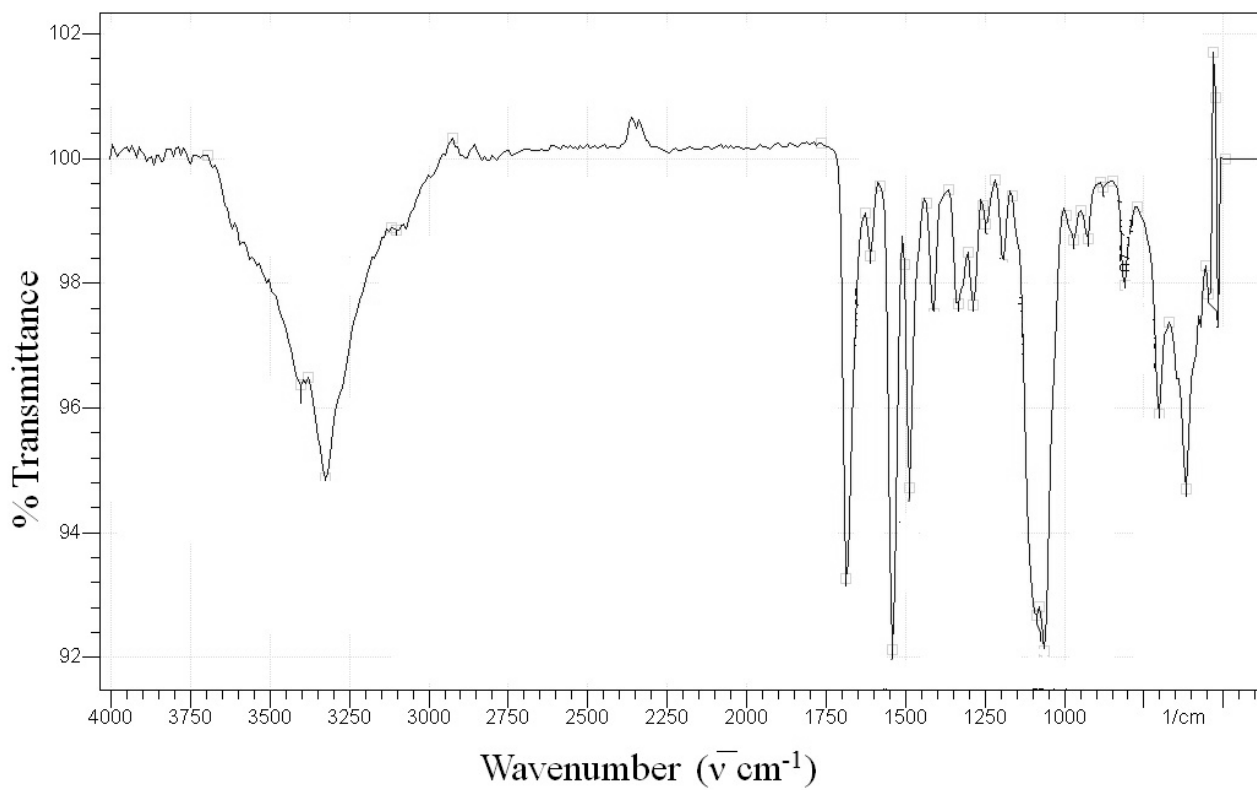

**IR (cm<sup>-1</sup>):** 3325(s), 3101 (w), 1689 (s), 1612(w), 1544(vs), 1488(s), 1411(m), 1334(m), 1288(m), 1248(w), 1195(w), 1064(vs), 972(w), 925(w), 810(m), 702(s), 617(s)



**Figure S 6. IR Spectra of Apohost 4:**

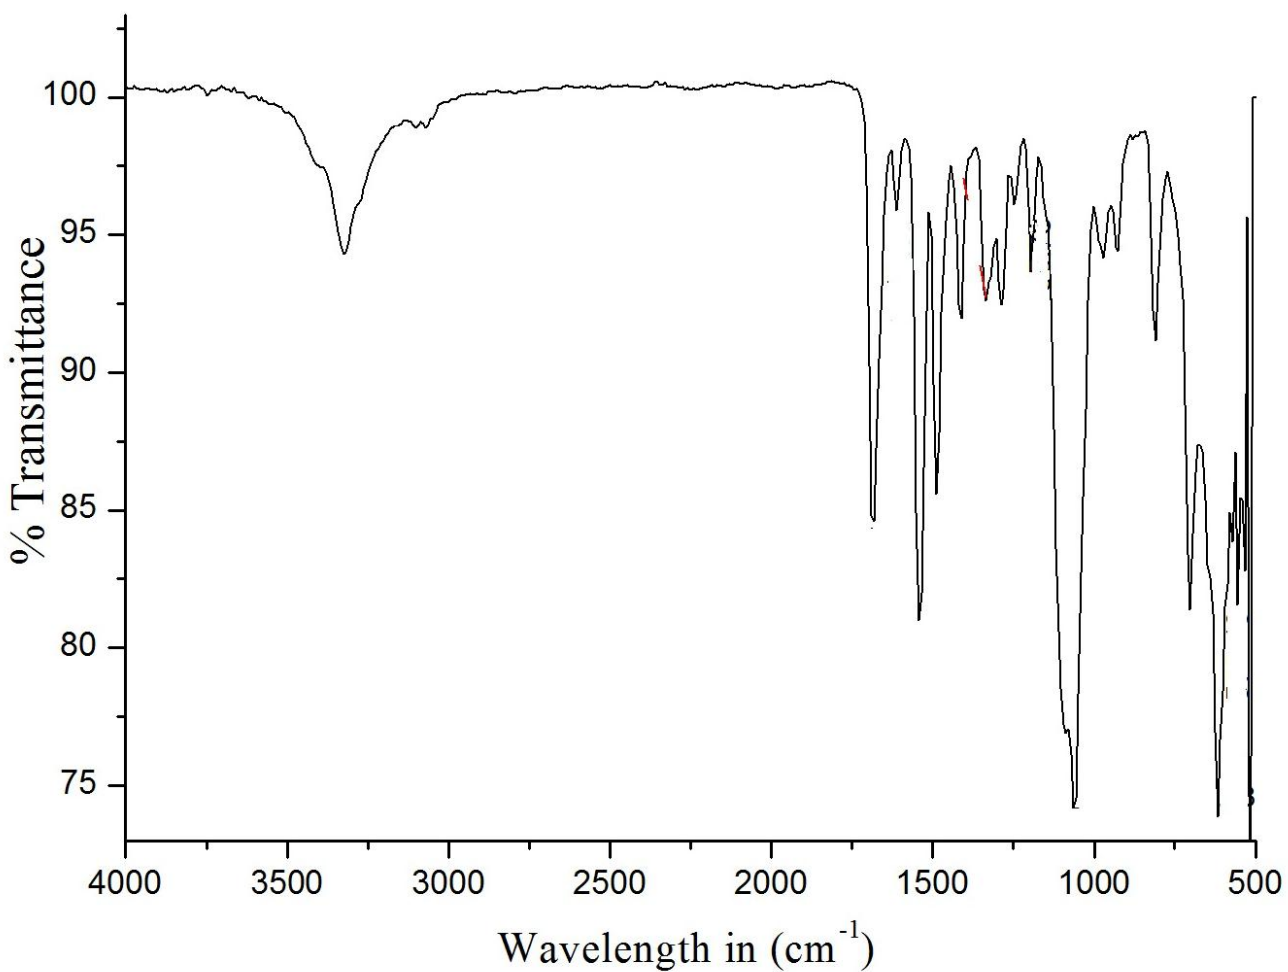

**IR (cm<sup>-1</sup>):** 3325(m), 3101 (w), 3070(w), 1681 (vs), 1612(m), 1542(vs), 1488(s), 1411(m), 1334(m), 1288(m), 1195(m), 1064(vs), 972(w), 925(w), 810(m), 702(s), 617(s)

**Figure S 7. Powder XRD of 3 (Experimental)**

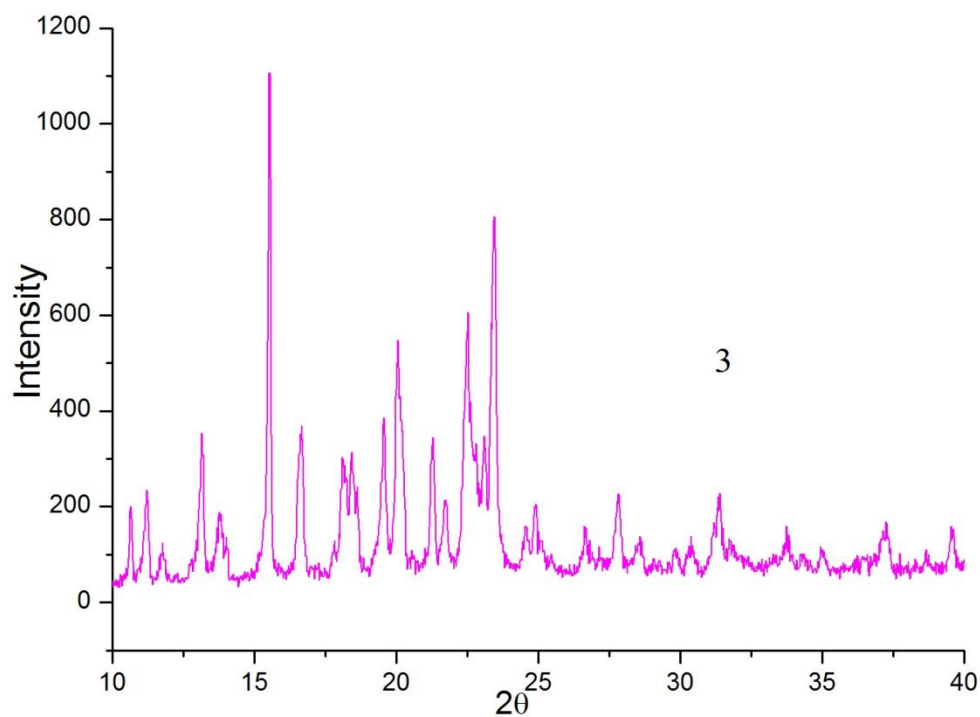

**Figure S 8. Powder XRD of 3 (Calculated):**

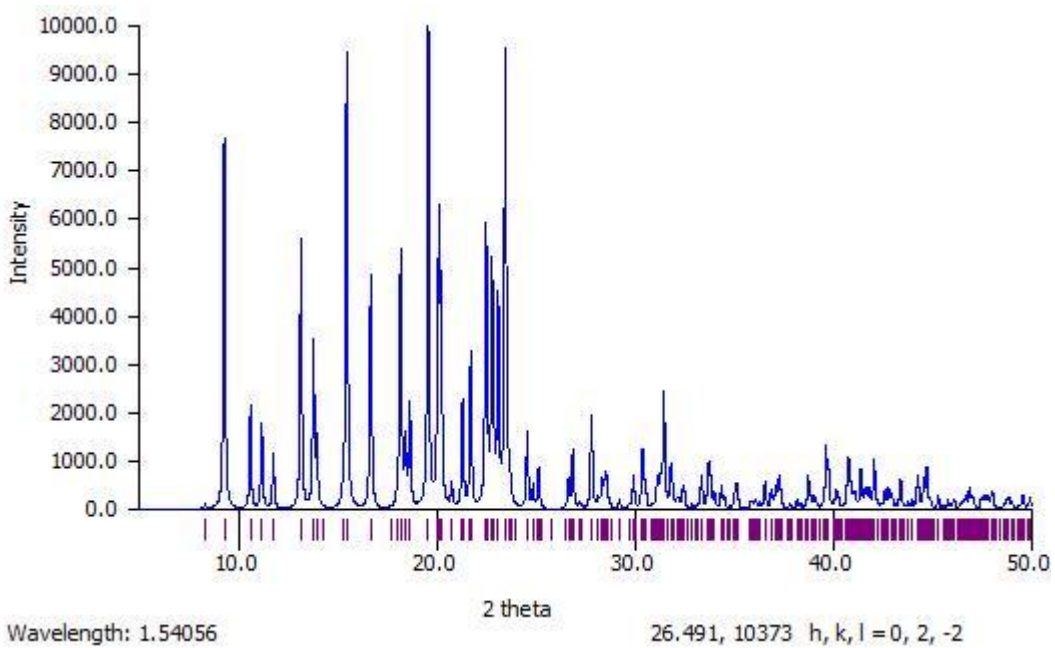

**Figure S 9. Powder XRD of 4a:**

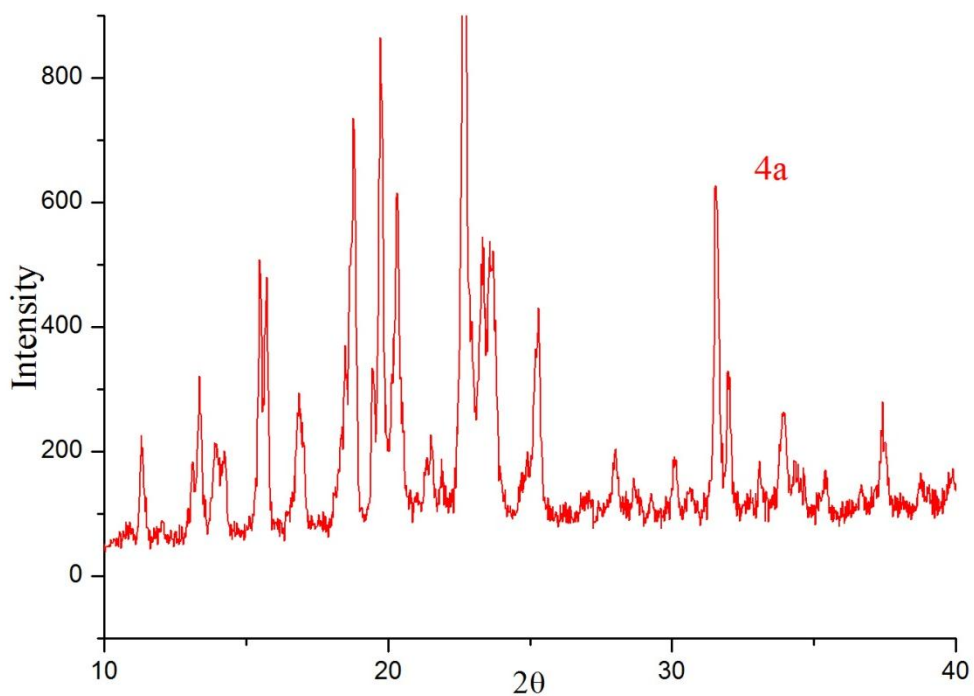

**Figure S 10. Powder XRD of 4b:**

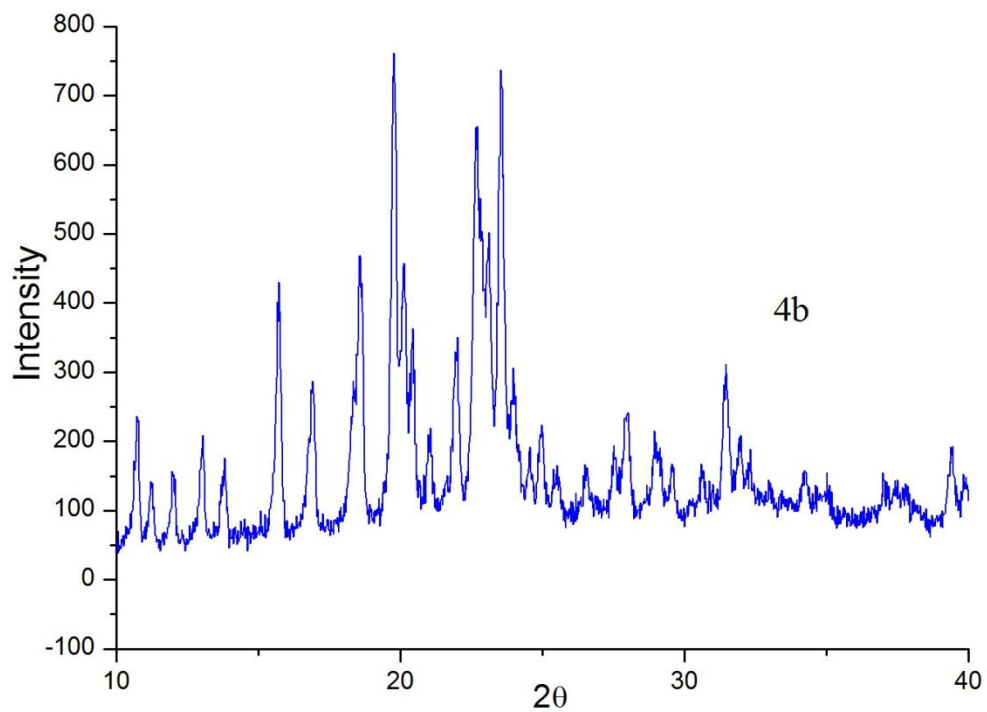

**Figure S 11. Powder XRD of 4c:**

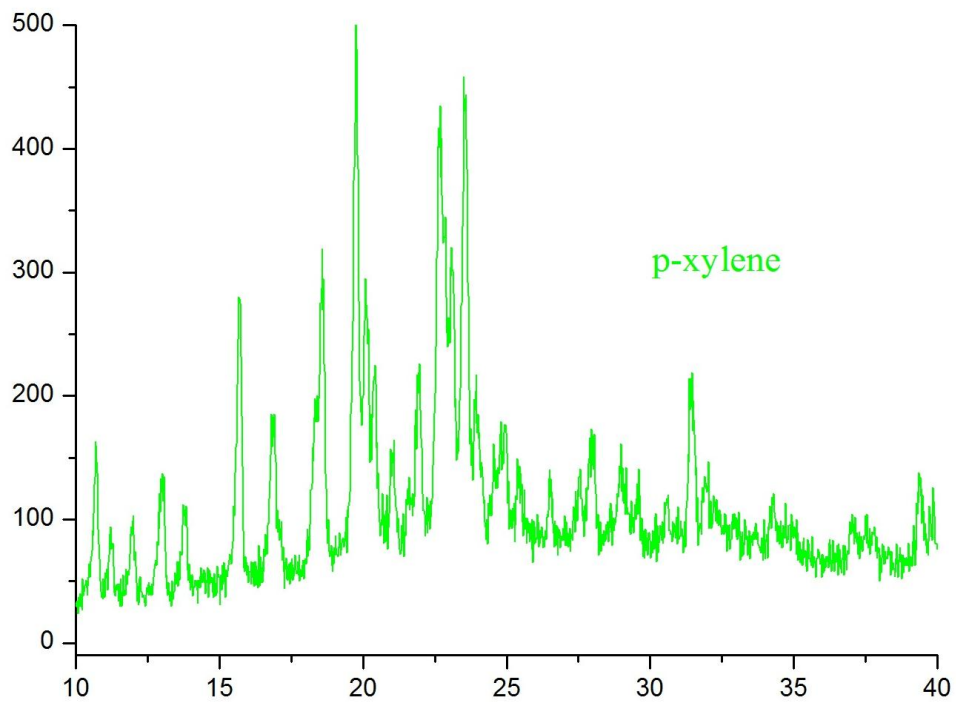

**Figure S 12. Powder XRD of Apohost 4:**

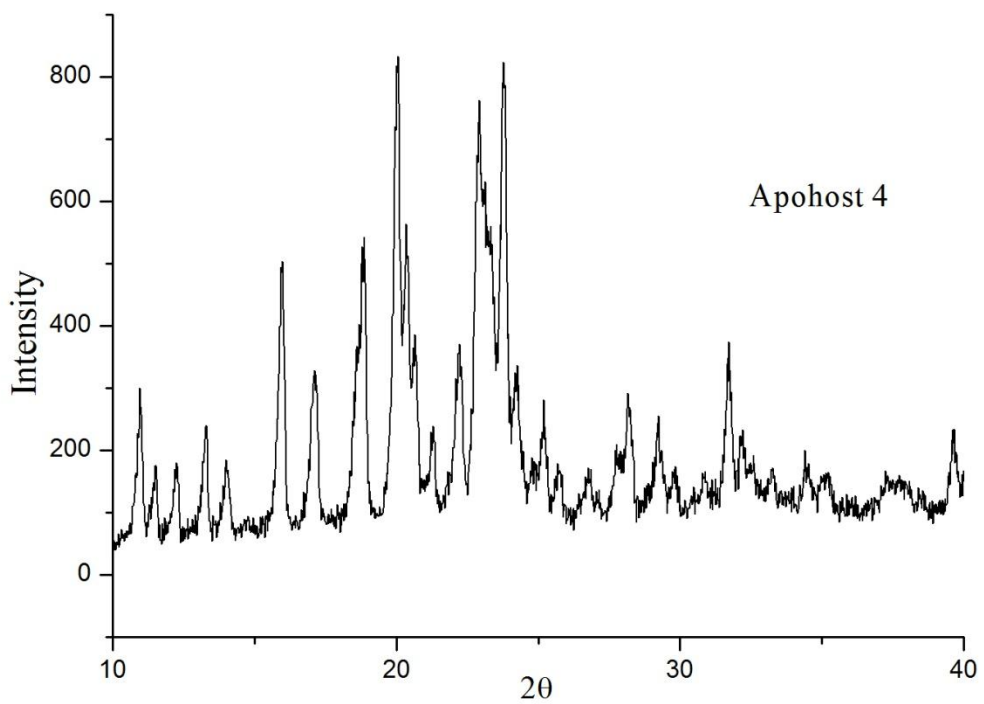

**Figure S 13. Solid State UV-Vis Spectra of Ligand 1a**

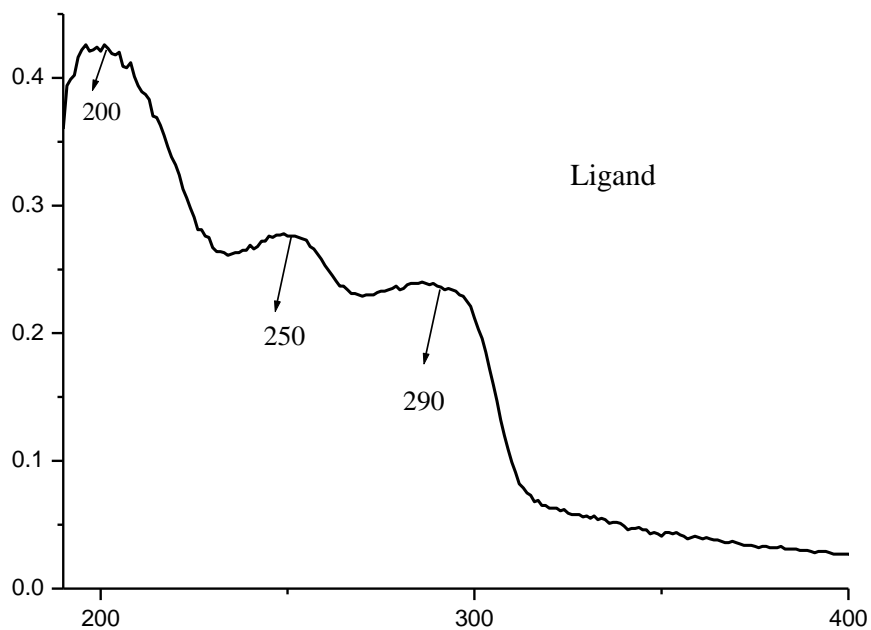

**Figure S 14. Solid State UV-Vis Spectra of 3**

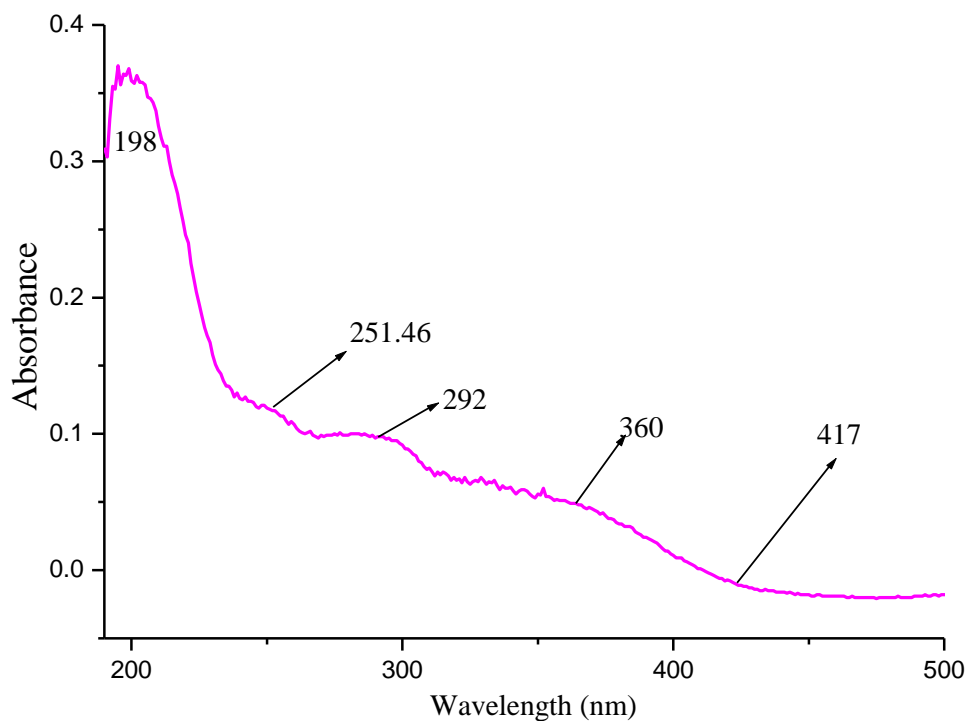

**Figure S 15. Solid State UV-Vis Spectra of Apohost 4:**

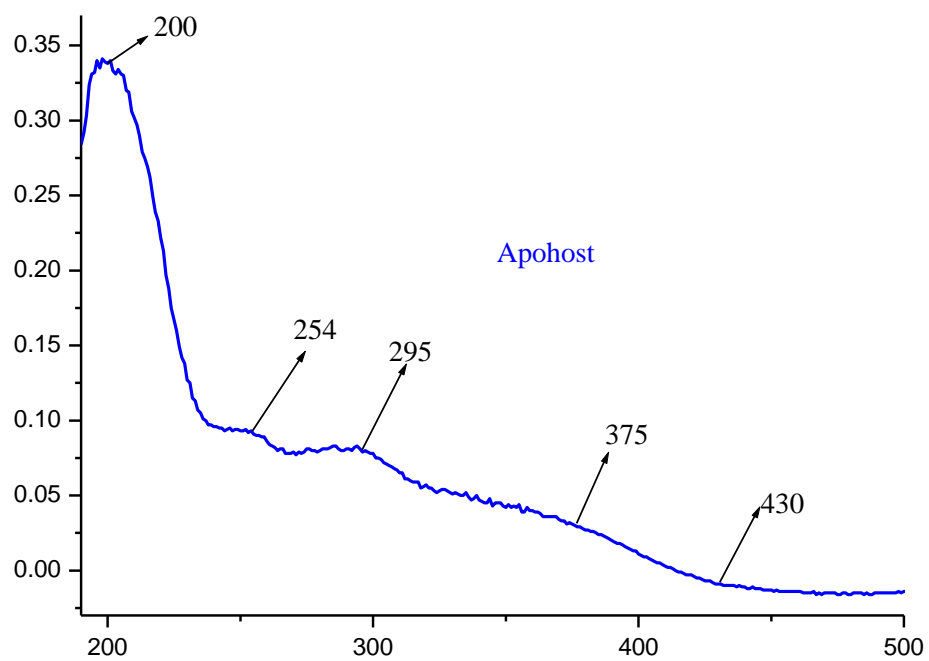

**Figure S 16. Solid State UV-Vis Spectra of 4a:**

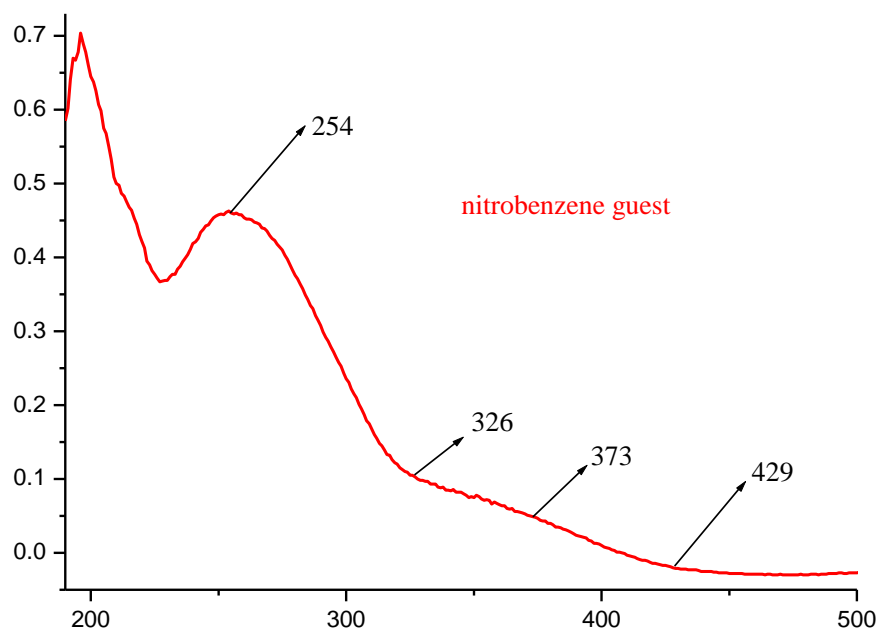

**Figure S 17. Solid State UV-Vis Spectra of 4b:**

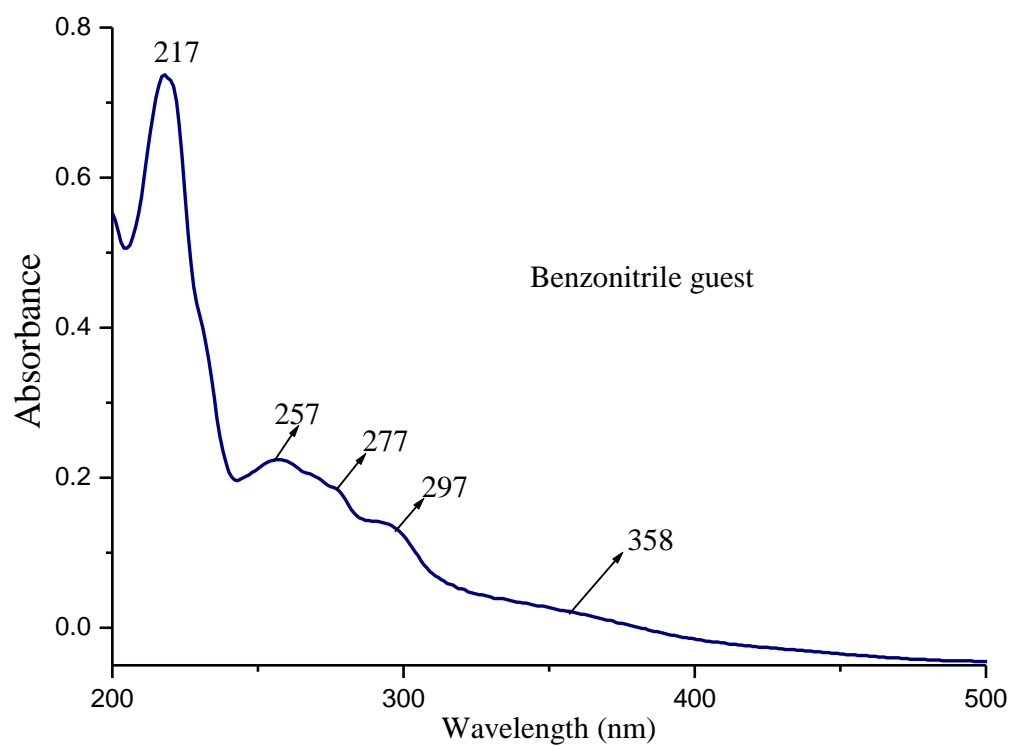

**Figure S 18. UV-Vis Spectra of known concentrations of nitrobenzene ( $\lambda_{\text{max}}$  at 262 nm):**

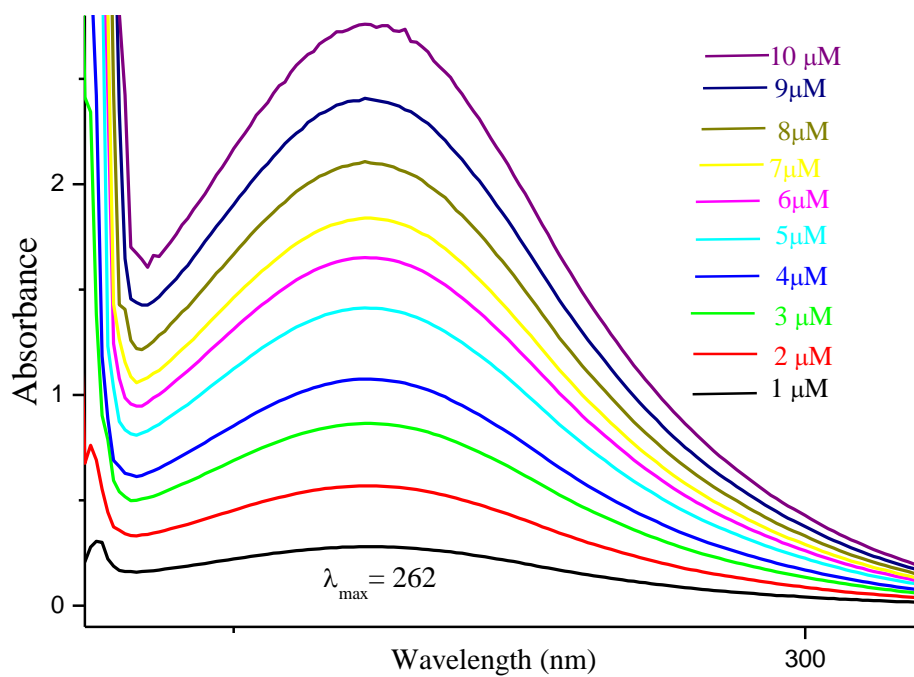

**Figure S 19. Calibration plot of nitrobenzene (Absorbance vs. Conc)**

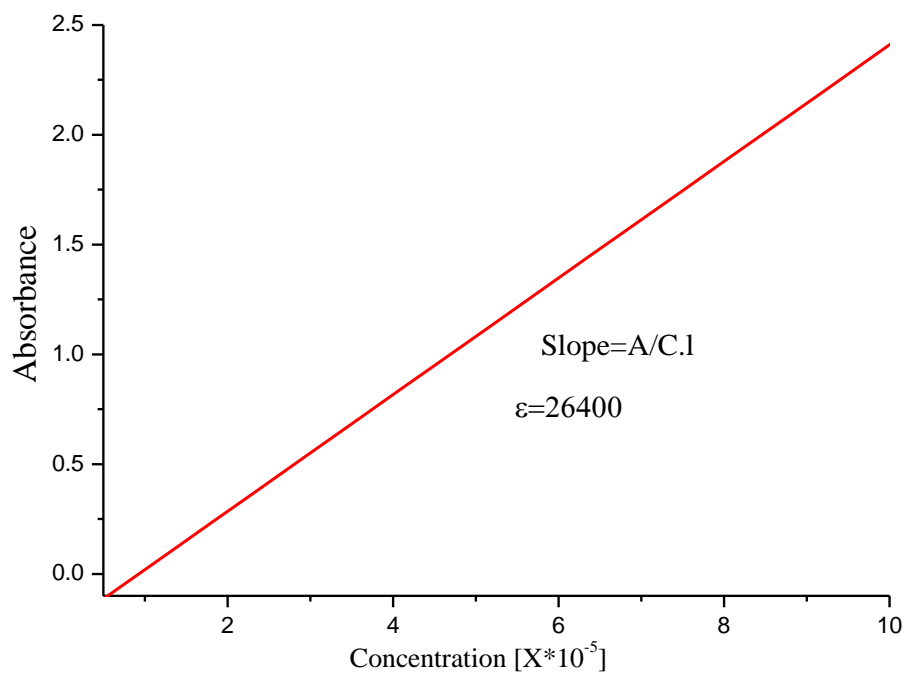



Figure S 20. Extracting nitrobenzene in chloroform from known amount of **4a**

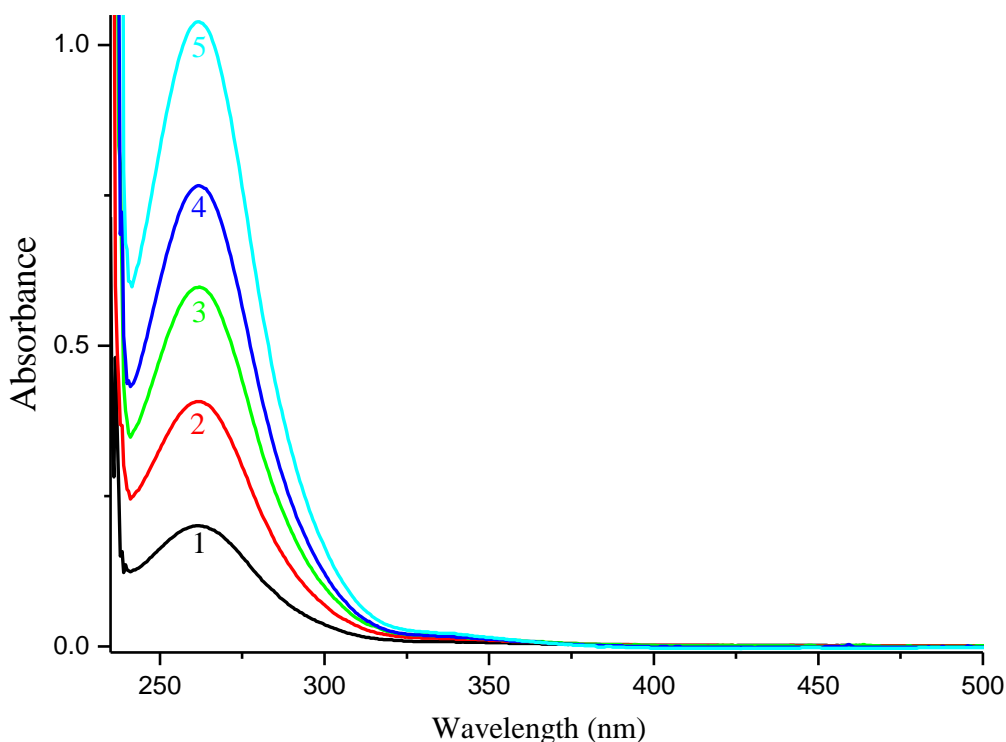

Table S 1.

| Plot no. | Wt. of MOF | Nitrobenzene conc. (molar)<br>$C=A/\epsilon.l$ | No. of Molecules<br>of<br>Nitrobenzene** |
|----------|------------|------------------------------------------------|------------------------------------------|
| 1        | 0.00237 gm | $0.761 \times 10^{-5} M$                       | 2.694004                                 |
| 2        | 0.00475 gm | $0.154 \times 10^{-4} M$                       | 2.720126                                 |
| 3        | 0.00712 gm | $0.207 \times 10^{-4} M$                       | 2.439228                                 |
| 4        | 0.00952 gm | $0.290 \times 10^{-4} M$                       | 2.555777                                 |
| 5        | 0.01190 gm | $0.393 \times 10^{-4} M$                       | 2.770815                                 |

\*\* Assuming the molecular weight of Apohost **4** = Cu +2 Ligand + 2 Coordinated H<sub>2</sub>O + 2ClO<sub>4</sub><sup>-</sup> = 63.5 + (2 × 270) + (2 × 18) + (2 × 99.5)=838.5 gm

Five sets of above given weight **4a** was taken in 10ml of chloroform and stirred overnight at RT. Then UV-Vis spectra were recorded for these five sets of extracted nitrobenzene in Chloroform. Using Lambert-Beer's Law, concentration of nitrobenzene was calculated.

Figure S 21. ORTEP of 3:

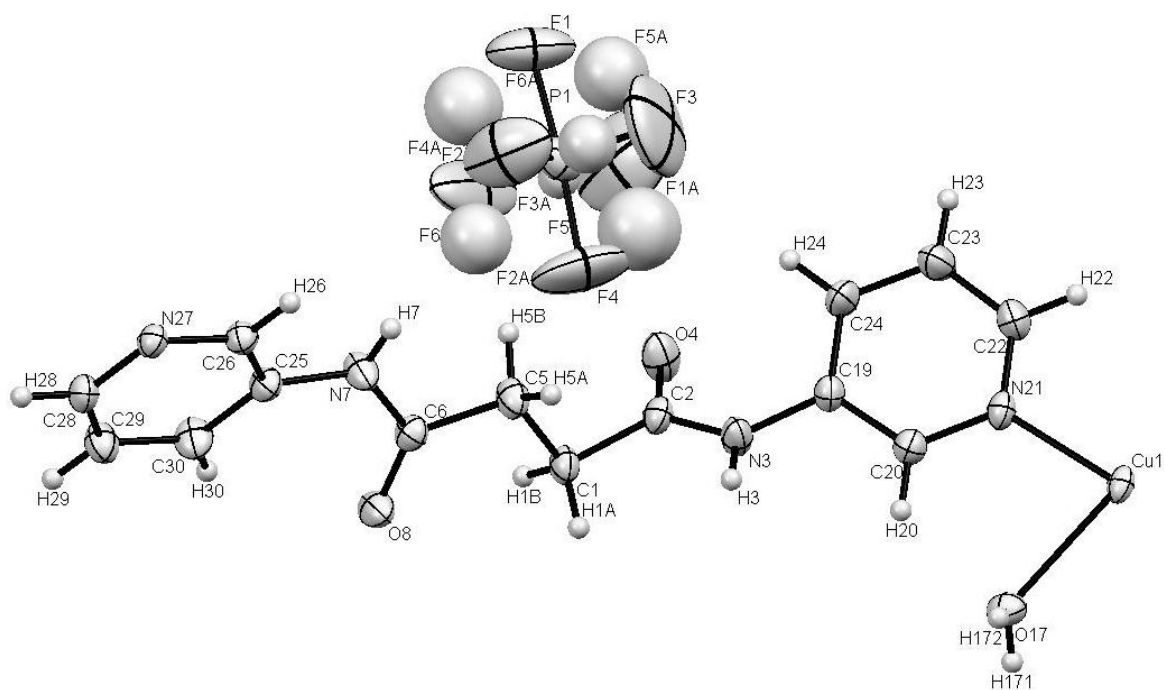

### References:

1. *CrysAlis PRO* (Oxford Diffraction, 2010, Oxford Diffraction Ltd., Yarnton, Oxfordshire, England)
2. G. M. Sheldrick, *Acta Cryst. A*, 2008, **64**, 112.
3. (a) M. Sarkar and K. Biradha, *Cryst. Growth Des.*, 2006, **6**, 202; (b) L. Rajput, S. Singha and K. Biradha, *Cryst. Growth Des.*, 2007, **7**, 2788.
